# Supplementary material
Source: PubMed Central journal article supplement (PMC3419943)
Supplement: NIHMS394820-supplement-01.pdf [file NIHMS394820-supplement-01.pdf]

## Supplemental Data

TABLE S1: Bacterial strains used throughout this study.

| Strain           | Genotype or description (species)                                                                 | Source or reference          |
|------------------|---------------------------------------------------------------------------------------------------|------------------------------|
| <i>E. coli</i>   |                                                                                                   |                              |
| DH10 $\beta$     | Cloning host                                                                                      | Knight Laboratory Collection |
| BL21 (DE3)/pLysS | Expression host                                                                                   | Novagen                      |
|                  |                                                                                                   |                              |
| <i>Bacillus</i>  |                                                                                                   |                              |
| KMS3             | <i>gerA::spec gerB::cm<math>\Omega</math>pcm::tet gerK::erm</i> ; PS832<br>( <i>B. subtilis</i> ) | This study                   |
| ADL18            | Wild type; PY79<br>( <i>B. subtilis</i> )                                                         | Driks Laboratory Collection  |
| ADL831           | Wild type; 569<br>( <i>B. cereus</i> )                                                            | Driks Laboratory Collection  |
| RG1              | Wild type; 34F2; pXO1 <sup>+</sup> pXO2 <sup>-</sup><br>( <i>B. anthracis</i> (Sterne))           | P. Jackson                   |
| ADL2260          | <i>bclA::kan</i><br>( <i>B. anthracis</i> (Sterne))                                               | J. Bozue                     |
| MGM203           | cotO $\Omega$ pMGM3<br>( <i>B. anthracis</i> (Sterne))                                            | (21)                         |
| KMS2             | <i>exsK<math>\Delta</math>::kan</i><br>( <i>B. anthracis</i> (Sterne))                            | (15)                         |

## A

VH1a2 CTGAGGCCGCCACCATGGAGACTGGGCTGCGCTGGCTTCTCCTGGTCGCTGTGCTCAAA  
 LEAATMETGLRWLLLVAVLK  
 VHy33 CTGAGGCCGCCACCATGGAGACTGGGCTGCGCTGGCTTCTCCTGGTCGCTGTGCTCAAA  
 LEAATMETGLRWLLLVAVLK  
 VH1a2 GGTGTCCAGTGTGAGTCCGGTGAAGGAGTCCGAGGGAGGTCTTTCAAGCCAACGGATACC  
 GVQCQSVESEGLFKPTDT  
 VHy33 GGTATCCAGTGTGAGTCCGGTGAAGGAGTCCGAGGGAGGTCTTTCAAGCCAACGGATACC  
 GIQCQQLSEQSGGGAAGGLVK  
 VH1a2 CTGACACTCACCTGCACAGTCTCTGGATTCTCCCTCAGTAGCAATGCAATAAGCTGGGT  
 LTLTCTVSGFSLSSNAISWV  
 VHy33 CCTGGGGATCCCTGGAACCTGCTGCAAAGCCTCTGGATTCTCCCTCAGTAGCAGCTAC  
 PGGSLLELCCKASGFSLSSSY  
 VH1a2 CGCCAGGCTCCAGGGAACGGGCTGGAAATGGATCGGAGCCATTTGGTAGTAGTGGTAGCGCA  
 RQAPGNGLIEWIGAISSSSA  
 VHy33 TGGATATGCTGGTCCGCCAGGCTCCAGGGAAGGGCTGGAGTGGATCGGATGCATTTAT  
 WICWVRQAPGKGLEWIGCIY  
 VH1a2 TACTACGCGAGCTGGCGAAAAGCCGATCCACCATCACCAGAAACCAACCTGAACACG  
 YYASWAKSRSTITRNTNLNT  
 VHy33 GCTGGTAGTAGTGGTAGCACTACTATGCGAGCTGGGTGAATGGCCGATTCACTCTCTCC  
 AGSSSGSTYYASWVNGRFTLS  
 VH1a2 GTGACTTGAAAATGACCACTGACAGCCGCGG  
 VTLKMTSLTAA  
 VHy33 AGAGACATCGACCAGAGCACAGGTTGCCTACAACCTGAACAGTCTGACAGCCGCGG  
 RDI DQS TGLQLNSLTA A

## B

Vκ GGTGGAGGAGGCTCAGCTGACATTGTGATGACCCAGACTCCAGCCTCCGTGGAGGACGCT  
 GGGGSADIVMTQTPTASVEAA  
 Vλ GGTGGAGGAGGCTCACAGCCTGTGCTGACTCAGTCGCCCTCTGCATCTGCTGCCCTGGGA  
 GGGGSQPVL TQS P S A S A A L G  
 Vκ GTGGGAGGCACAGTCCATCAAGTGCAGGCCAGTCCAGGCATTAGTAGTTACTTAGCC  
 VGGTVTIKCAASQGIS SYLA  
 Vλ TCCTCGCCAAGCTCACCTGCACTCTGAGCAGTGTCAAGACCTACTATATGAATGG  
 S S A K L T C T L S S A H K T Y Y I E W  
 Vκ TGGTATCAGCAGAAACCAGGGCAGCCTCCCAAGCTCCTGATCTACAGGGCATCCACTG  
 WYQQQKPGQP PKLLIYRASTL  
 Vλ TATCAGCAGCAGCAAGGGGAGGCCCTCGGTACTGTGATGAGCTTAAGAGTGTGGAAGC  
 YQQQQQGEAPRYLMQLKSDGS  
 Vκ GCATCTGGGGTCCCATCGCGTTCAAAGGCAGTGGATCTGGGCCGAGTTCCGCTCTCAGC  
 ASGVPSRFKGS SGPQFALS  
 Vλ TACACCAAGGGGACCGGGTCCCTGATCGCTTCTCGGGCTCCAGCTCTGGGGCTGACCGC  
 YTKGTGV PDRFSSSSSGADR  
 Vκ ATCAGCGACCTGGAGTGTGCCGACTGCTGCACTACTACTGTGACACTATTATTATATT  
 ISDLECA D A A T Y Y C Q T Y Y Y I  
 Vλ TACTTGATCATCTCCAGCGTCCAGGCTGAGGACGAAGCTGACTACATCTGTGGTGTAAC  
 YLIIS SVQA E D E A D Y I C G V T  
 Vκ AGTGGTAGTAGTTATGGTGCTTTCGGCGGAGGGACCGAGGTGGTTGTCAAAGGTGAATTC  
 S G S S Y G A F G G G T E V V V K G E F  
 Vλ GGTAGTAATGTTTATGTGTTTCGGCGGAGGGACCGAGTACCCTCACAGGTGAATTC  
 GSNVYVFGGGTQLTVTGEF

**FIGURE S1. Nucleotide and amino acid sequences of V<sub>H</sub> and V<sub>L</sub> germline genes**

**used for scFv-Ig constructs. A, V<sub>H</sub>1a2 and V<sub>Hy</sub>33 sequences. B, V<sub>κ</sub> and V<sub>λ</sub> sequences.**

For details of scFv-Ig construction, refer to Materials and Methods.

TABLE S2. Identity of scFv-Ig<sup>+</sup> intestinal isolates from Fig. 1.

| scFv-Ig <sup>+</sup> Isolate | Growth conditions      | 16S rRNA gene sequence identity                                           |
|------------------------------|------------------------|---------------------------------------------------------------------------|
| 1                            | LB, aerobic            | <i>Bacillus pumilus</i>                                                   |
| 2                            | Blood agar, aerobic    | <i>Bacillus subtilis</i> , <i>Bacillus ameloliquefaciens</i> <sup>1</sup> |
| 3                            | Phenylethanol, aerobic | <i>Bacillus pumilus</i>                                                   |
| 4                            | Blood agar, aerobic    | <i>Bacillus subtilis</i> subspecies                                       |
| 5                            | Blood agar, anaerobic  | <i>Bacteroides uniformis</i>                                              |
| 6                            | Blood agar, anaerobic  | <i>Bacteroides ovatus</i>                                                 |

<sup>1</sup>Based on the 16S rRNA gene sequence of the second isolate, we were unable to distinguish between *Bacillus subtilis* and *Bacillus ameloliquefaciens*. As a result, this isolate is designated by both names throughout the manuscript.

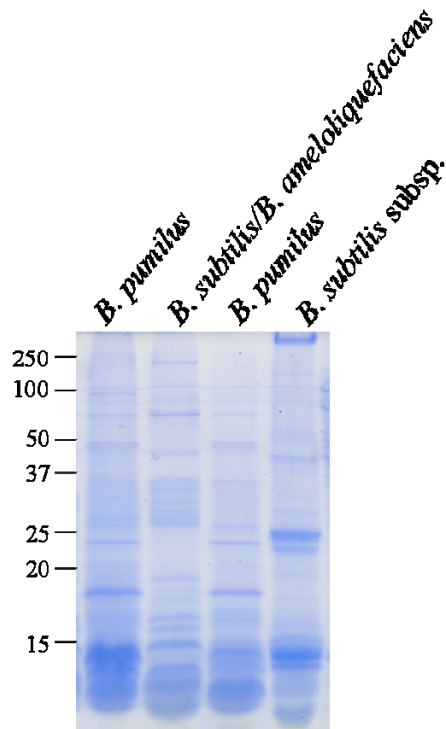

**FIGURE S2. Electrophoretic analysis of extracts from intestinal *Bacillus* spores from Fig. 1F.** To assess the efficiency of the spore protein extractions, lysates from the indicated intestinal *Bacillus* spores were analyzed by SDS polyacrylamide gel electrophoresis followed by Coomassie blue staining. While many proteins were extracted from spores, scFv-Ig bound to only a small number of proteins, demonstrating the specificity of scFv-Ig binding.

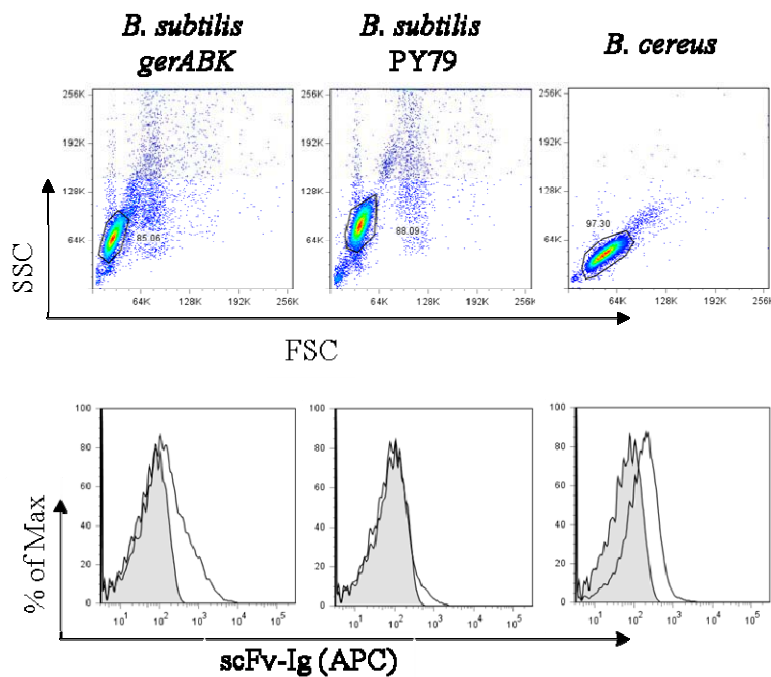

**FIGURE S3. Flow cytometric analysis of *Bacillus* spores stained with scFv-Ig (related to Fig. 2).** Purified spores of the indicated *Bacillus* species were stained with scFv-Ig followed by mouse anti-rabbit Fc $\gamma$  and Dylight™ 649-conjugated goat Fab anti-mouse IgG. The FSC vs SSC plots are depicted in the top rows, and the scFv-Ig histograms are shown in the bottom rows. The scFv-Ig plots (unshaded histograms) were compared to staining with indirect reagents alone (shaded histograms). A limited amount of binding was observed to the surface of *B. subtilis* and *B. cereus* spores.

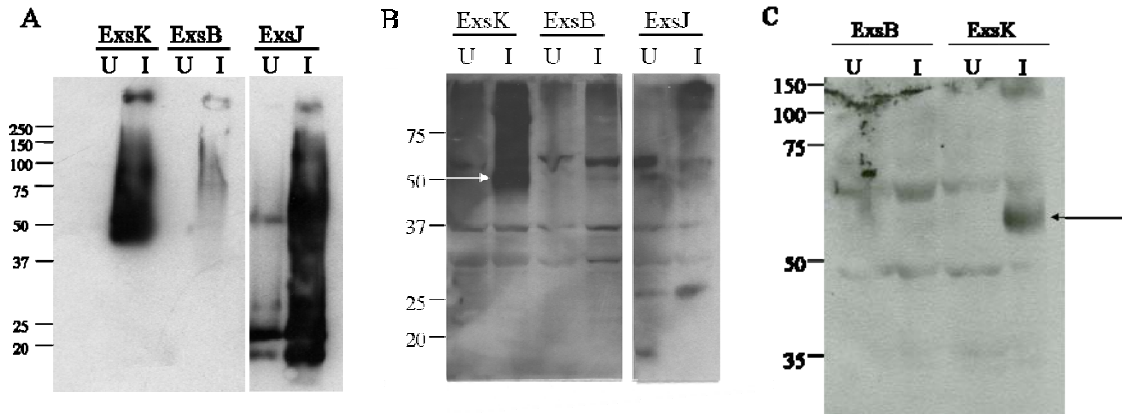

**FIGURE S4. Western blot analyses of *B. anthracis* spore proteins (related to Fig. 3).**

*A-C*, *E. coli* lysates uninduced (U) or induced (I) to produce the indicated T7-tagged *B. anthracis* protein were probed with anti-T7-HRP (A) or rabbit IgM from serum of a 6-day-old (B) or 3-week-old (C) rabbit. Arrows indicate IgM binding. These data suggest that although all four *B. anthracis* proteins were expressed, IgM bound only to ExsK.

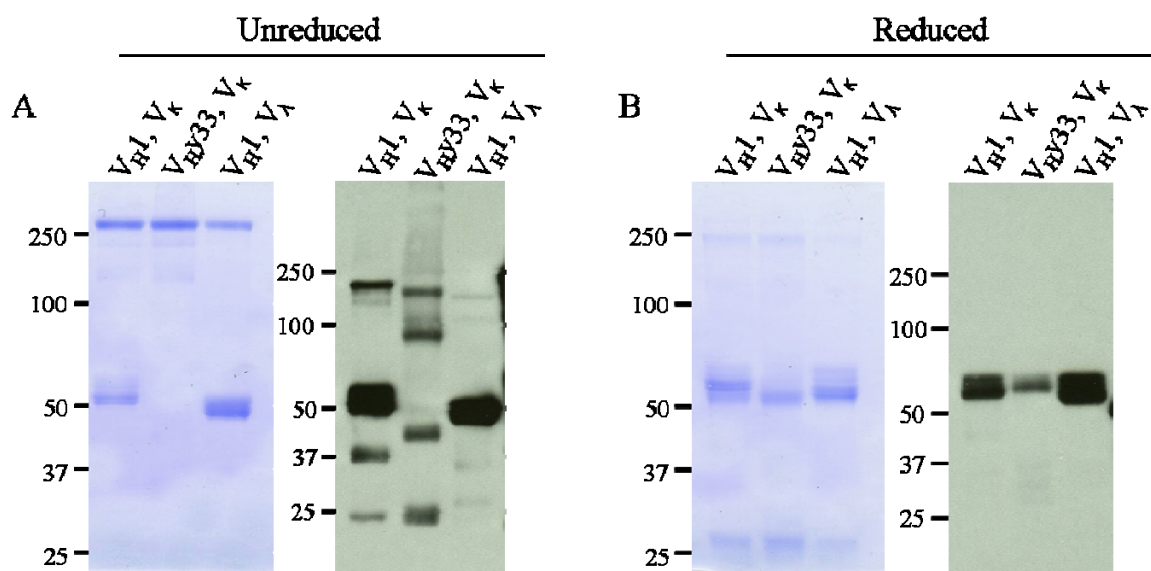

**FIGURE S5. Electrophoretic analysis of scFv-Ig proteins from Fig. 4.** Coomassie blue-stained SDS polyacrylamide gels (left) and western blots (right) of purified scFv-Ig proteins probed with HRP-conjugated donkey anti-rabbit IgG. Proteins were either left unreduced (A) or reduced (B) prior to gel loading to assess the purity as well as the aggregation status.  $V_{H1}$  encodes  $V_{Ha}$ ;  $V_{HY33}$  encodes  $V_{Hn}$ . These data suggest that the aggregation status of the scFv-Ig proteins does not affect binding to spores.

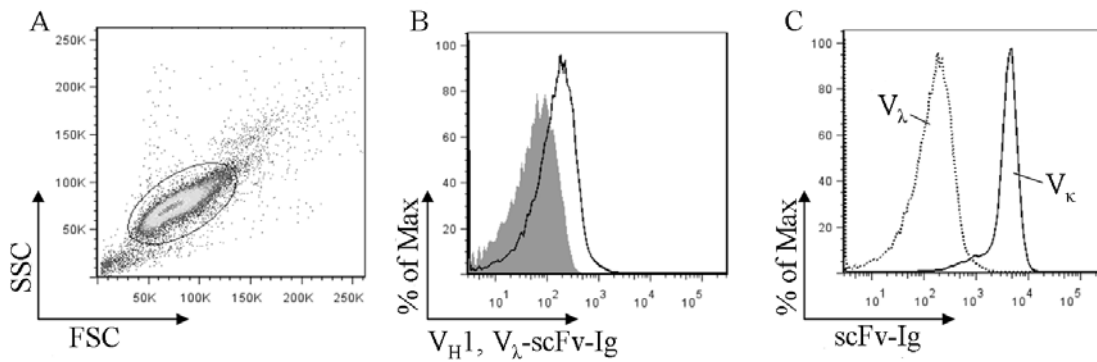

**FIGURE S6. Flow cytometric analysis of *bclA* mutant *B. anthracis* spores stained with scFv-Igs from Fig. 4.** *A*, FSC vs SSC dot plot spores. Gate indicates population used for staining analyses in *B* and *C*. *B*, Histograms of spores stained with  $V_{H1}$ ,  $V_{\lambda}$ -scFv-Ig followed by mouse anti-rabbit Fc $\gamma$  and FITC-conjugated goat Fab anti-mouse IgG (unshaded) or secondary antibodies alone (shaded). *C*, Histogram overlay comparing  $V_{H1}$ ,  $V_{\kappa}$ -scFv-Ig (from Fig. 2C) and  $V_{H1}$ ,  $V_{\lambda}$ -scFv-Ig staining (from part *B*). These data confirm that  $V_{H1}$ ,  $V_{\kappa}$ -scFv-Ig binds more intensely to spores than does  $V_{H1}$ ,  $V_{\lambda}$ -scFv-Ig.
